# Supplementary material
Source: PubMed Central journal article supplement (PMC5683734)
Supplement: zmp_29_3_115_esm1.pdf [file zmp_29_3_115_esm1.pdf]

Table A1

*Descriptives and Cronbach's Alpha for variables of interest for the subsample used for the cross-lagged models*

|                       | <i>Min</i> | <i>Max</i> | <i>M</i> | <i>SD</i> | <i>Skew</i> | <i>Kurtosis</i> | <i>Cronbach's Alpha</i> |
|-----------------------|------------|------------|----------|-----------|-------------|-----------------|-------------------------|
| <b>Wave 1</b>         |            |            |          |           |             |                 |                         |
| Asking for advice     | 1          | 5          | 1.46     | 0.85      | 1.76        | 1.98            |                         |
| Strong ties           | 0          | 500        | 24.11    | 36.46     | 5.85        | 55.9            |                         |
| Social support online | 1          | 4.56       | 2.13     | 0.82      | 0.2         | -0.95           | 0.88                    |
| Life satisfaction     | 1          | 7          | 5.18     | 1.19      | -0.82       | 1.15            |                         |
| Stress                | 1          | 5          | 2.63     | 0.93      | 0.39        | -0.33           | 0.82                    |
| <b>Wave 2</b>         |            |            |          |           |             |                 |                         |
| Asking for advice     | 1          | 5          | 1.43     | 0.79      | 1.73        | 2.02            |                         |
| Strong ties           | 0          | 900        | 24.71    | 45.93     | 12.31       | 217.35          |                         |
| Social support online | 1          | 4.78       | 2.11     | 0.85      | 0.39        | -0.82           | 0.88                    |
| Life satisfaction     | 1          | 7          | 5.2      | 1.21      | -0.75       | 1.04            |                         |
| Stress                | 1          | 5          | 2.64     | 0.94      | 0.35        | -0.25           | 0.82                    |
| <b>Wave 3</b>         |            |            |          |           |             |                 |                         |
| Asking for advice     | 1          | 5          | 1.44     | 0.79      | 1.7         | 2.09            |                         |
| Strong ties           | 0          | 532        | 26.33    | 38.86     | 6.97        | 72.41           |                         |
| Social support online | 1          | 4.33       | 2.05     | 0.83      | 0.41        | -0.73           | 0.87                    |
| Life satisfaction     | 1          | 7          | 5.21     | 1.15      | -0.65       | 0.76            |                         |
| Stress                | 1          | 5          | 2.57     | 0.89      | 0.23        | -0.36           | 0.79                    |

| <b>Wave 4</b>         |   |      |       |       |       |        |      |
|-----------------------|---|------|-------|-------|-------|--------|------|
| Asking for advice     | 1 | 5    | 1.4   | 0.78  | 2.04  | 3.69   |      |
| Strong ties           | 0 | 880  | 26.59 | 45.03 | 12.26 | 215.72 |      |
| Social support online | 1 | 4    | 2.07  | 0.83  | 0.29  | -1.03  | 0.88 |
| Life satisfaction     | 1 | 7    | 5.23  | 1.18  | -0.66 | 0.76   |      |
| Stress                | 1 | 5    | 2.54  | 0.92  | 0.41  | -0.17  | 0.81 |
| <b>Wave 5</b>         |   |      |       |       |       |        |      |
| Asking for advice     | 1 | 5    | 1.37  | 0.74  | 1.92  | 2.81   |      |
| Strong ties           | 0 | 300  | 26.6  | 32.31 | 4.09  | 23.82  |      |
| Social support online | 1 | 4.56 | 2.06  | 0.85  | 0.38  | -0.84  | 0.89 |
| Life satisfaction     | 1 | 7    | 5.29  | 1.15  | -0.56 | 0.49   |      |
| Stress                | 1 | 5    | 2.46  | 0.93  | 0.52  | -0.09  | 0.82 |
| <b>Wave 6</b>         |   |      |       |       |       |        |      |
| Asking for advice     | 1 | 5    | 1.36  | 0.75  | 2.13  | 4.06   |      |
| Strong ties           | 0 | 400  | 25.84 | 30.49 | 4.75  | 41.76  |      |
| Social support online | 1 | 4.56 | 2.04  | 0.83  | 0.36  | -0.89  | 0.9  |
| Life satisfaction     | 1 | 7    | 5.19  | 1.19  | -0.79 | 1.03   |      |
| Stress                | 1 | 5    | 2.5   | 0.92  | 0.41  | -0.26  | 0.82 |



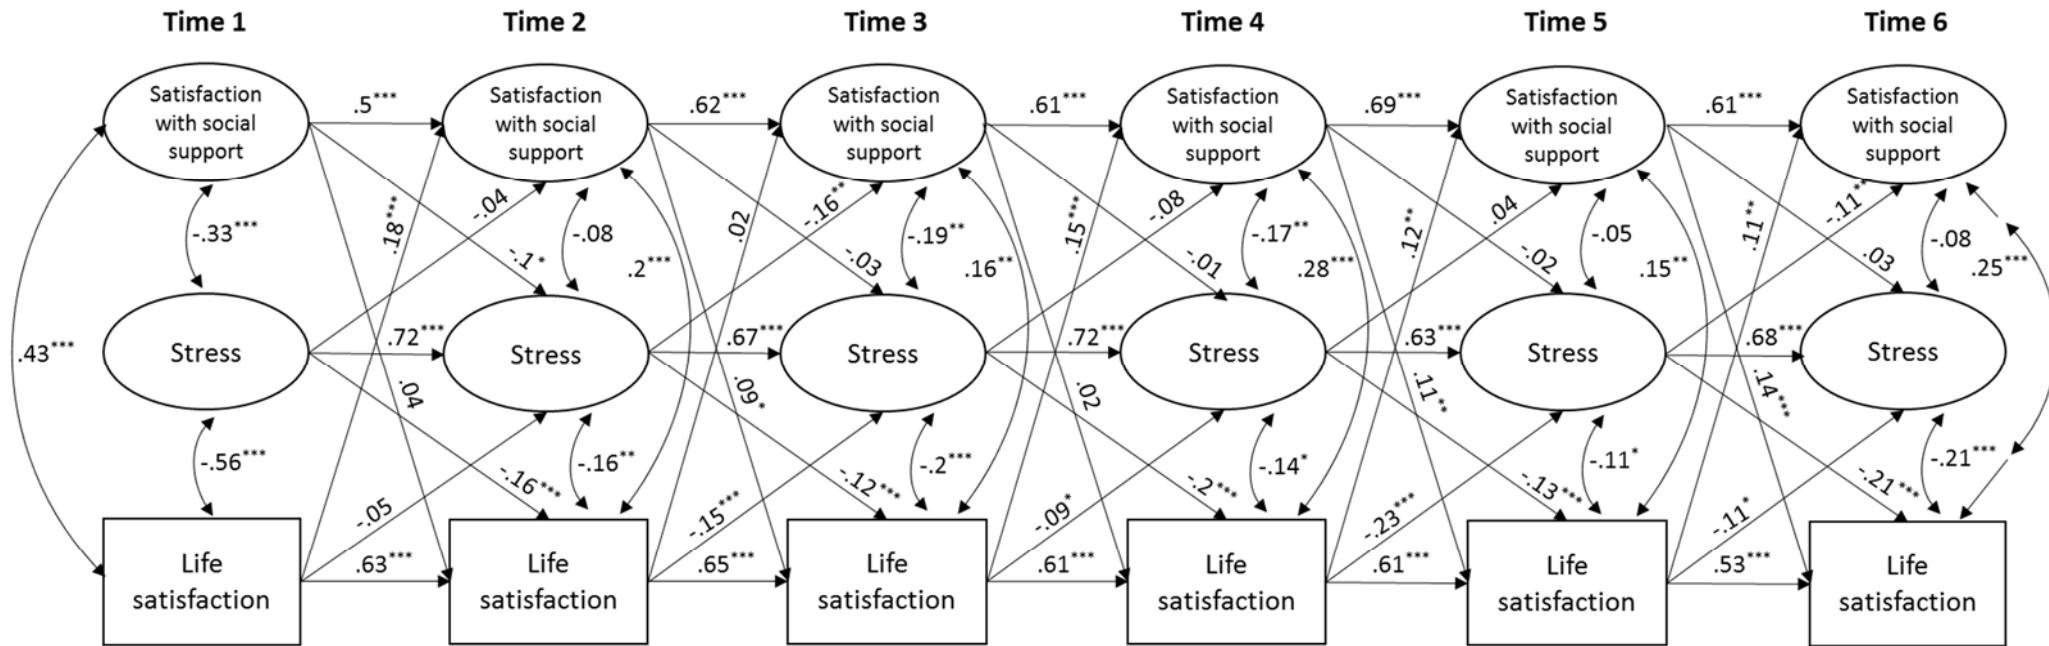

Figure A2. Cross-sectional and longitudinal relationships between satisfaction with social support, life satisfaction, and stress. Standardized coefficients, \*  $p \leq .05$ , \*\*  $p \leq .01$ , \*\*\*  $p \leq .001$ , ML estimation,  $\chi^2(d.f. = 692, N = 624) = 1666.1, p < .001, CFI = .94, TLI = .92, RMSEA = .05$ .
